# Supplementary material for: Phytoplankton-Zooplankton Community Structure in Coal Mining Subsidence Lake
Source: MDPI journal article supplement (doi:10.3390/ijerph20010484), 2022-12-28
Supplement: s1 [file s1]

**Table S1.** Longitude and latitude coordinates of sampling points.

| Sampling Point | Latitude    | Longitude    |
|----------------|-------------|--------------|
| S1             | N 33°50'56" | E 116°17'43" |
| S2             | N 33°14'42" | E 116°12'21" |
| S3             | N 33°33'03" | E 116°39'44" |
| S4             | N 33°37'07" | E 116°36'38" |
| S5             | N 33°37'12" | E 116°36'59" |
| S6             | N 33°37'15" | E 116°36'59" |
| S7             | N 33°37'13" | E 116°37'14" |
| S8             | N 33°37'23" | E 116°37'10" |
| S9             | N 33°18'6"  | E 116°07'14" |
| S10            | N 33°19'32" | E 116°04'55" |
| S11            | N 33°49'23" | E 116°04'88" |
| S12            | N 33°05'40" | E 116°57'79" |

**Table S2.** Physical and chemical indices of water samples in different sampling points.

| Sampling points | T °C | TN mg/L | NO <sub>3</sub> <sup>-</sup> mg/L | H m  | SD m | pH   | DO mg/L | EC us/cm | TDS ppm | COD <sub>Cr</sub> mg/L | SO <sub>4</sub> <sup>2-</sup> mg/L | NH <sub>4</sub> <sup>+</sup> mg/L | TP mg/L | PO <sub>4</sub> <sup>3-</sup> mg/L | F <sup>-</sup> mg/L | CL <sup>-</sup> mg/L |
|-----------------|------|---------|-----------------------------------|------|------|------|---------|----------|---------|------------------------|------------------------------------|-----------------------------------|---------|------------------------------------|---------------------|----------------------|
| S1              | 4.9  | 2.42    | 4.88                              | 2.30 | 1.00 | 8.20 | 10.3    | 2048     | 1004    | 33                     | 136.0                              | 0.00                              | 0.268   | 0.08                               | 0.356               | 61.9                 |
| S2              | 5.3  | 2.40    | 5.66                              | 1.50 | 0.80 | 8.33 | 9.9     | 2011     | 1048    | 20                     | 136.0                              | 0.19                              | 0.126   | 0.06                               | 0.402               | 65.2                 |
| S3              | 5.0  | 2.71    | 6.84                              | 2.70 | 0.90 | 8.08 | 10.7    | 2046     | 1015    | 50                     | 172.0                              | 0.28                              | 0.264   | 0.10                               | 0.403               | 62.1                 |
| S4              | 5.9  | 1.22    | 5.10                              | 4.50 | 1.90 | 8.58 | 10.1    | 1648     | 828     | 12                     | 179.0                              | 0.06                              | 0.048   | 0.04                               | 0.656               | 71.8                 |
| S5              | 4.8  | 1.10    | 7.71                              | 7.00 | 1.34 | 7.63 | 11.1    | 1582     | 810     | 19                     | 183.0                              | 0.11                              | 0.052   | 0.04                               | 0.324               | 49.8                 |
| S6              | 5.1  | 1.39    | 14.70                             | 6.00 | 1.50 | 8.57 | 11.3    | 1651     | 827     | 12                     | 39.8                               | 0.12                              | 0.045   | 0.04                               | 0.223               | 42.9                 |
| S7              | 5.0  | 0.87    | 4.72                              | 3.00 | 1.64 | 8.33 | 11.8    | 1639     | 819     | 12                     | 135.0                              | 0.09                              | 0.055   | 0.04                               | 0.318               | 50.5                 |
| S8              | 4.8  | 1.27    | 4.94                              | 3.50 | 1.20 | 8.59 | 10.5    | 1652     | 826     | 11                     | 137.0                              | 0.08                              | 0.055   | 0.04                               | 0.380               | 50.8                 |
| S9              | 5.9  | 1.82    | 5.94                              | 1.39 | 1.08 | 8.62 | 10.6    | 2193     | 1098    | 20                     | 174.0                              | 0.03                              | 0.097   | 0.05                               | 0.232               | 50.2                 |
| S10             | 6.0  | 1.90    | 8.59                              | 3.64 | 1.37 | 8.69 | 12.0    | 2146     | 1073    | 26                     | 159.0                              | 0.07                              | 0.087   | 0.05                               | 0.188               | 69.3                 |
| S11             | 5.4  | 2.29    | 6.77                              | 5.80 | 1.10 | 8.50 | 12.1    | 2230     | 1103    | 44                     | 158.0                              | 0.13                              | 0.097   | 0.05                               | 0.345               | 66.7                 |
| S12             | 6.0  | 1.98    | 4.67                              | --   | --   | 8.63 | 10.5    | 1482     | 742     | 13                     | 136.0                              | 0.04                              | 0.097   | 0.09                               | 0.436               | 49.3                 |

**Table S3.** Spatial distribution of plankton abundance in the sampling points.

|                                                       |                 | S1         | S2       | S3         | S4      | S5       | S6       | S7       | S8       | S9       | S10      | S11      | S12      |
|-------------------------------------------------------|-----------------|------------|----------|------------|---------|----------|----------|----------|----------|----------|----------|----------|----------|
| Zooplankton Density (ind./L)                          | Protozoa*       | 115200.000 | 855.000  | 186000.000 | 600.000 | 1560.000 | 1620.000 | 2940.000 | 2040.000 | 3182.500 | 6750.000 | 5005.000 | 1560.000 |
|                                                       | Rotifera        | 300.000    | 765.000  | 300.000    | 240.000 | 2580.000 | 900.000  | 3900.000 | 4380.000 | 2565.000 | 2850.000 | 1870.000 | 1020.000 |
|                                                       | Cladocera       | 2.400      | 4.800    | 3.600      | 0.475   | 3.600    | 0.000    | 3.000    | 0.150    | 1.800    | 0.600    | 4.800    | 4.800    |
|                                                       | Copepoda*       | 26.400     | 25.800   | 49.800     | 1.900   | 18.600   | 1.800    | 22.200   | 0.150    | 22.200   | 6.600    | 9.000    | 22.800   |
|                                                       | Nauplii         | 0.000      | 0.000    | 1.200      | 0.000   | 0.000    | 0.000    | 0.000    | 0.000    | 0.000    | 0.600    | 0.000    | 0.600    |
|                                                       | Total density*  | 115529.000 | 1650.600 | 186355.000 | 842.375 | 4162.000 | 2521.800 | 6865.000 | 6420.300 | 5771.500 | 9608.000 | 6888.800 | 2608.200 |
| Phytoplankton cell density (.10 <sup>6</sup> cells/L) | Cyanophyta      | 0.201      | 2.089    | 0.214      | 0.000   | 0.000    | 0.038    | 0.063    | 0.000    | 0.252    | 0.000    | 0.000    | 0.000    |
|                                                       | Bacillariophyta | 0.478      | 0.705    | 0.818      | 0.025   | 0.050    | 0.088    | 0.013    | 0.013    | 0.327    | 0.050    | 1.422    | 0.075    |
|                                                       | Chlorophyta     | 0.075      | 1.258    | 0.390      | 0.226   | 0.013    | 0.264    | 0.151    | 0.453    | 0.063    | 0.277    | 0.289    | 0.013    |
|                                                       | Cryptophyta*    | 35.656     | 0.717    | 50.918     | 0.176   | 0.440    | 0.252    | 0.365    | 0.591    | 0.189    | 0.642    | 0.390    | 0.377    |
|                                                       | Chrysophyta*    | 0.000      | 0.428    | 0.000      | 0.113   | 0.981    | 0.101    | 1.397    | 0.868    | 4.152    | 1.887    | 7.838    | 2.013    |
|                                                       | Euglenophyta    | 0.239      | 0.113    | 0.000      | 0.000   | 0.000    | 0.013    | 0.000    | 0.000    | 0.189    | 0.000    | 0.000    | 0.038    |
|                                                       | Pyrrophyta      | 0.000      | 0.000    | 0.000      | 0.000   | 0.000    | 0.013    | 0.000    | 0.038    | 0.101    | 0.000    | 0.075    | 0.000    |
|                                                       | Total density*  | 36.650     | 5.309    | 52.340     | 0.541   | 1.485    | 0.767    | 1.988    | 1.963    | 5.272    | 2.856    | 10.015   | 2.516    |

\* Indicates significant differences among Coal gangue hills sites (S1, S2 and S3), Subsidence Lake (S4, S5, S6, S7, S8) and Huihe River along with Xiangshun canal (S9, S10, S11, S12) through one-way ANOVA at the 0.05 significance level, p < 0.05.

Table S4. Biomass of plankton community in the sampling points

| Biomass<br>(mg/L) |                    | S1     | S2     | S3      | S4     | S5     | S6     | S7     | S8     | S9     | S10    | S11    | S12    |
|-------------------|--------------------|--------|--------|---------|--------|--------|--------|--------|--------|--------|--------|--------|--------|
| Zooplankton       | Protozoa*          | 5.7600 | 0.0428 | 9.3000  | 0.0300 | 0.0780 | 0.0810 | 0.1470 | 0.1020 | 0.1591 | 0.3375 | 0.2503 | 0.0780 |
|                   | Rotifera           | 0.3600 | 0.9180 | 0.3600  | 0.2880 | 3.0960 | 1.0800 | 4.6800 | 5.2560 | 3.0780 | 3.4200 | 2.2440 | 1.2240 |
|                   | Cladocera          | 0.0480 | 0.0960 | 0.0720  | 0.0095 | 0.0720 | 0.0000 | 0.0600 | 0.0030 | 0.0360 | 0.0120 | 0.0960 | 0.0960 |
|                   | Copepods*          | 0.1848 | 0.1806 | 0.3486  | 0.0133 | 0.1302 | 0.0126 | 0.1554 | 0.0011 | 0.1554 | 0.0462 | 0.0630 | 0.1596 |
|                   | Nauplii            | 0.0000 | 0.0000 | 0.0036  | 0.0000 | 0.0000 | 0.0000 | 0.0000 | 0.0000 | 0.0000 | 0.0018 | 0.0000 | 0.0018 |
|                   | Total wet biomass  | 6.3528 | 1.2374 | 10.0842 | 0.3408 | 3.3762 | 1.1736 | 5.0424 | 5.3621 | 3.4285 | 3.8175 | 2.6533 | 1.5594 |
| Phytoplankton     | Cyanophyta*        | 0.0053 | 0.0219 | 0.0056  | 0.0000 | 0.0000 | 0.0010 | 0.0035 | 0.0000 | 0.0009 | 0.0000 | 0.0000 | 0.0000 |
|                   | Bacillariophyta    | 0.0744 | 0.1124 | 0.1326  | 0.0067 | 0.0067 | 0.0072 | 0.0020 | 0.0007 | 0.0571 | 0.0072 | 0.2691 | 0.0469 |
|                   | Chlorophyta        | 0.0160 | 0.6460 | 0.0360  | 0.0910 | 0.0204 | 0.0082 | 0.0006 | 0.2115 | 0.0228 | 0.1931 | 0.0012 | 0.0158 |
|                   | Cryptophyta        | 2.2632 | 0.0918 | 2.7969  | 0.3257 | 0.0240 | 0.3824 | 0.5466 | 0.3483 | 0.4317 | 1.3519 | 0.4427 | 0.9161 |
|                   | Chrysophyta*       | 0.0000 | 0.3074 | 0.0000  | 0.1032 | 0.5699 | 0.0569 | 0.8438 | 0.4940 | 2.4922 | 1.1265 | 4.6546 | 1.2192 |
|                   | Euglenophyta       | 0.1910 | 0.0804 | 0.0000  | 0.0000 | 0.0000 | 0.0089 | 0.0000 | 0.0000 | 0.1341 | 0.0000 | 0.0000 | 0.0268 |
|                   | Pyrrophyta         | 0.0000 | 0.0000 | 0.0000  | 0.0000 | 0.0000 | 0.0476 | 0.0000 | 0.4354 | 1.1611 | 0.0000 | 0.2856 | 0.0000 |
|                   | Total wet biomass* | 2.5498 | 1.2599 | 2.9712  | 0.5265 | 0.6210 | 0.5123 | 1.3965 | 1.4899 | 4.2998 | 2.6787 | 5.6532 | 2.2247 |

\* Indicates significant differences among Coal gangue hills sites (S1, S2 and S3), Subsidence Lake (S4, S5, S6, S7, S8) and Huihe River along with Xiangshun canal (S9, S10, S11, S12) through one-way ANOVA at the 0.05 significance level, p < 0.05.

Table S5. Bio-diversity index of plankton community in sampling points.

| Diversity index H’ | S1   | S2   | S3   | S4   | S5   | S6   | S7   | S8   | S9   | S10  | S11  | S12  |
|--------------------|------|------|------|------|------|------|------|------|------|------|------|------|
| Phytoplankton      | 0.20 | 2.60 | 0.24 | 1.97 | 1.17 | 2.04 | 1.53 | 1.52 | 1.47 | 1.66 | 1.40 | 1.33 |
| Zooplankton        | 1.18 | 1.90 | 1.42 | 1.66 | 2.00 | 2.28 | 2.15 | 1.72 | 2.45 | 2.39 | 2.36 | 2.35 |
